# Supplementary material for: Crystalline polymer nanofibers with ultra-high strength and thermal conductivity
Source: PubMed Central journal article supplement (PMC5916895; doi:10.1038/s41467-018-03978-3), 2018-04-25
Supplement: 41467_2018_3978_MOESM2_ESM.pdf [file 41467_2018_3978_MOESM2_ESM.pdf]

## **Description of Additional Supplementary Files**

**File Name: Supplementary Movie 1**

**Description:** Movie during localized heat drawing of Polyethylene microfiber to nanofiber.
